# Supplementary material for: Characteristics of rheumatoid arthritis and its association with major comorbid conditions: cross-sectional study of 502 649 UK Biobank participants
Source: PubMed Central journal article supplement (PMC4932291; doi:10.1136/rmdopen-2016-000267), 2016-06-14
Supplement: rmdopen-2016-000267supp_tables.pdf [file rmdopen-2016-000267supp_tables.pdf]

**Supplementary Table 1.** Medications for rheumatoid arthritis recorded by UK Biobank participants

---

| Steroids                                                                                                                                                                                             | Synthetic DMARDs                                                                                                                                                                                                                                                                                                                                                                                                                      | Biologic DMARDs                                                                                                                                                                |
|------------------------------------------------------------------------------------------------------------------------------------------------------------------------------------------------------|---------------------------------------------------------------------------------------------------------------------------------------------------------------------------------------------------------------------------------------------------------------------------------------------------------------------------------------------------------------------------------------------------------------------------------------|--------------------------------------------------------------------------------------------------------------------------------------------------------------------------------|
| corticosteroids<br>depomedrone<br>triamcinilone<br>methylprednisolone<br>prednisolone<br>prednisone ( <i>also listed in UK Biobank as Deltacortril enteric; Deltastab; Precortisyl; Prednesola</i> ) | Auranofin ( <i>also listed in UK Biobank as Ridaura</i> )<br>Azathioprine ( <i>also listed in UK Biobank as Imuran</i> )<br>hydroxychloroquine ( <i>also listed in UK Biobank as Plaquenil</i> )<br>leflunomide ( <i>also listed in UK Biobank as Arava</i> )<br>methotrexate<br>methotrexate injections<br>myocrisin<br>penicillamine<br>sulfasalazine ( <i>also listed in UK Biobank as Sulazine; salazopyrin; sulphasalazine</i> ) | abatacept<br>adalimumab ( <i>also listed in UK Biobank as Humira injection solution</i> )<br>certolizumab<br>etanercept<br>golimumab<br>infliximab<br>rituximab<br>tocilizumab |

---

**Supplementary Table 2.** Prevalence of rheumatoid arthritis by sex and age

|                   |             | <b>No rheumatoid<br/>arthritis N (%)</b> | <b>Treated<br/>rheumatoid<br/>arthritis N (%)</b> | <b>Rheumatoid<br/>arthritis: all N<br/>(%)</b> |
|-------------------|-------------|------------------------------------------|---------------------------------------------------|------------------------------------------------|
| <b>Male</b>       | 0-50 years  | 53,028 (99.64)                           | 84 (0.16)                                         | 193 (0.36)                                     |
|                   | 51-65 years | 127,572 (99.25)                          | 433 (0.34)                                        | 967 (0.75)                                     |
|                   | ≥65 years   | 46,876 (98.85)                           | 271 (0.57)                                        | 546 (1.15)                                     |
|                   | All ages    | 227,476 (99.26)                          | 788 (0.34)                                        | 1,706 (0.74)                                   |
| <b>Female</b>     | 0-50 years  | 64,213 (99.25)                           | 237 (0.37)                                        | 482 (0.75)                                     |
|                   | 51-65 years | 157,699 (98.46)                          | 1,283 (0.80)                                      | 2,468 (1.54)                                   |
|                   | ≥65 years   | 47,604 (97.94)                           | 541 (1.11)                                        | 1,001 (2.06)                                   |
|                   | All ages    | 269,516 (98.56)                          | 2,061 (0.75)                                      | 3,951 (1.44)                                   |
| <b>Both sexes</b> | 0-50 years  | 117,241 (99.43)                          | 321 (0.27)                                        | 675 (0.57)                                     |
|                   | 51-65 years | 285,271 (98.81)                          | 1,716 (0.60)                                      | 3,435 (1.19)                                   |
|                   | ≥65 years   | 94,480 (98.39)                           | 812 (0.85)                                        | 1,547 (1.61)                                   |
|                   | All ages    | 496,992 (98.87)                          | 2,849 (0.57)                                      | 5,657 (1.13)                                   |

**Supplementary Table 3.** Self-reported Non-steroidal anti-inflammatory drug (NSAID) and COX-2 inhibitor usage.

|                           |     | No<br>rheumatoid<br>arthritis N<br>(%) | Treated<br>rheumatoid<br>arthritis N<br>(%) | P-value | Rheumatoid<br>arthritis: all<br>N (%) | P-value |
|---------------------------|-----|----------------------------------------|---------------------------------------------|---------|---------------------------------------|---------|
| NSAID<br>use              | No  | 433,325<br>(87.19)                     | 2,383<br>(83.64)                            | <0.001  | 4,630<br>(81.85)                      | <0.001  |
|                           | Yes | 63,667<br>(12.81)                      | 4766<br>(16.36)                             |         | 1,027<br>(18.15)                      |         |
| COX-2<br>inhibitor<br>use | No  | 496,197<br>(99.84)                     | 2,751<br>(96.56)                            | <0.001  | 5,514<br>(97.47)                      | <0.001  |
|                           | Yes | 795 (0.16)                             | 98 (3.44)                                   |         | 143 (2.53)                            |         |

Types of non-steroidal anti-inflammatory drugs (NSAIDs) used included Ibuprofen, ibuprofen plus codeine phosphate, and Naproxen. Types of COX-2 inhibitors examined included Parecoxib, Etoricoxib, Valdecoxib, Rofecoxib and Celecoxib.
